# Supplementary figures and images for: Genome-Wide Expression Difference of MicroRNAs in Basal Cell Carcinoma
Source: Hindawi journal article supplement (doi:10.1155/2021/7223500), 2021-08-04

Supplementary figure 1

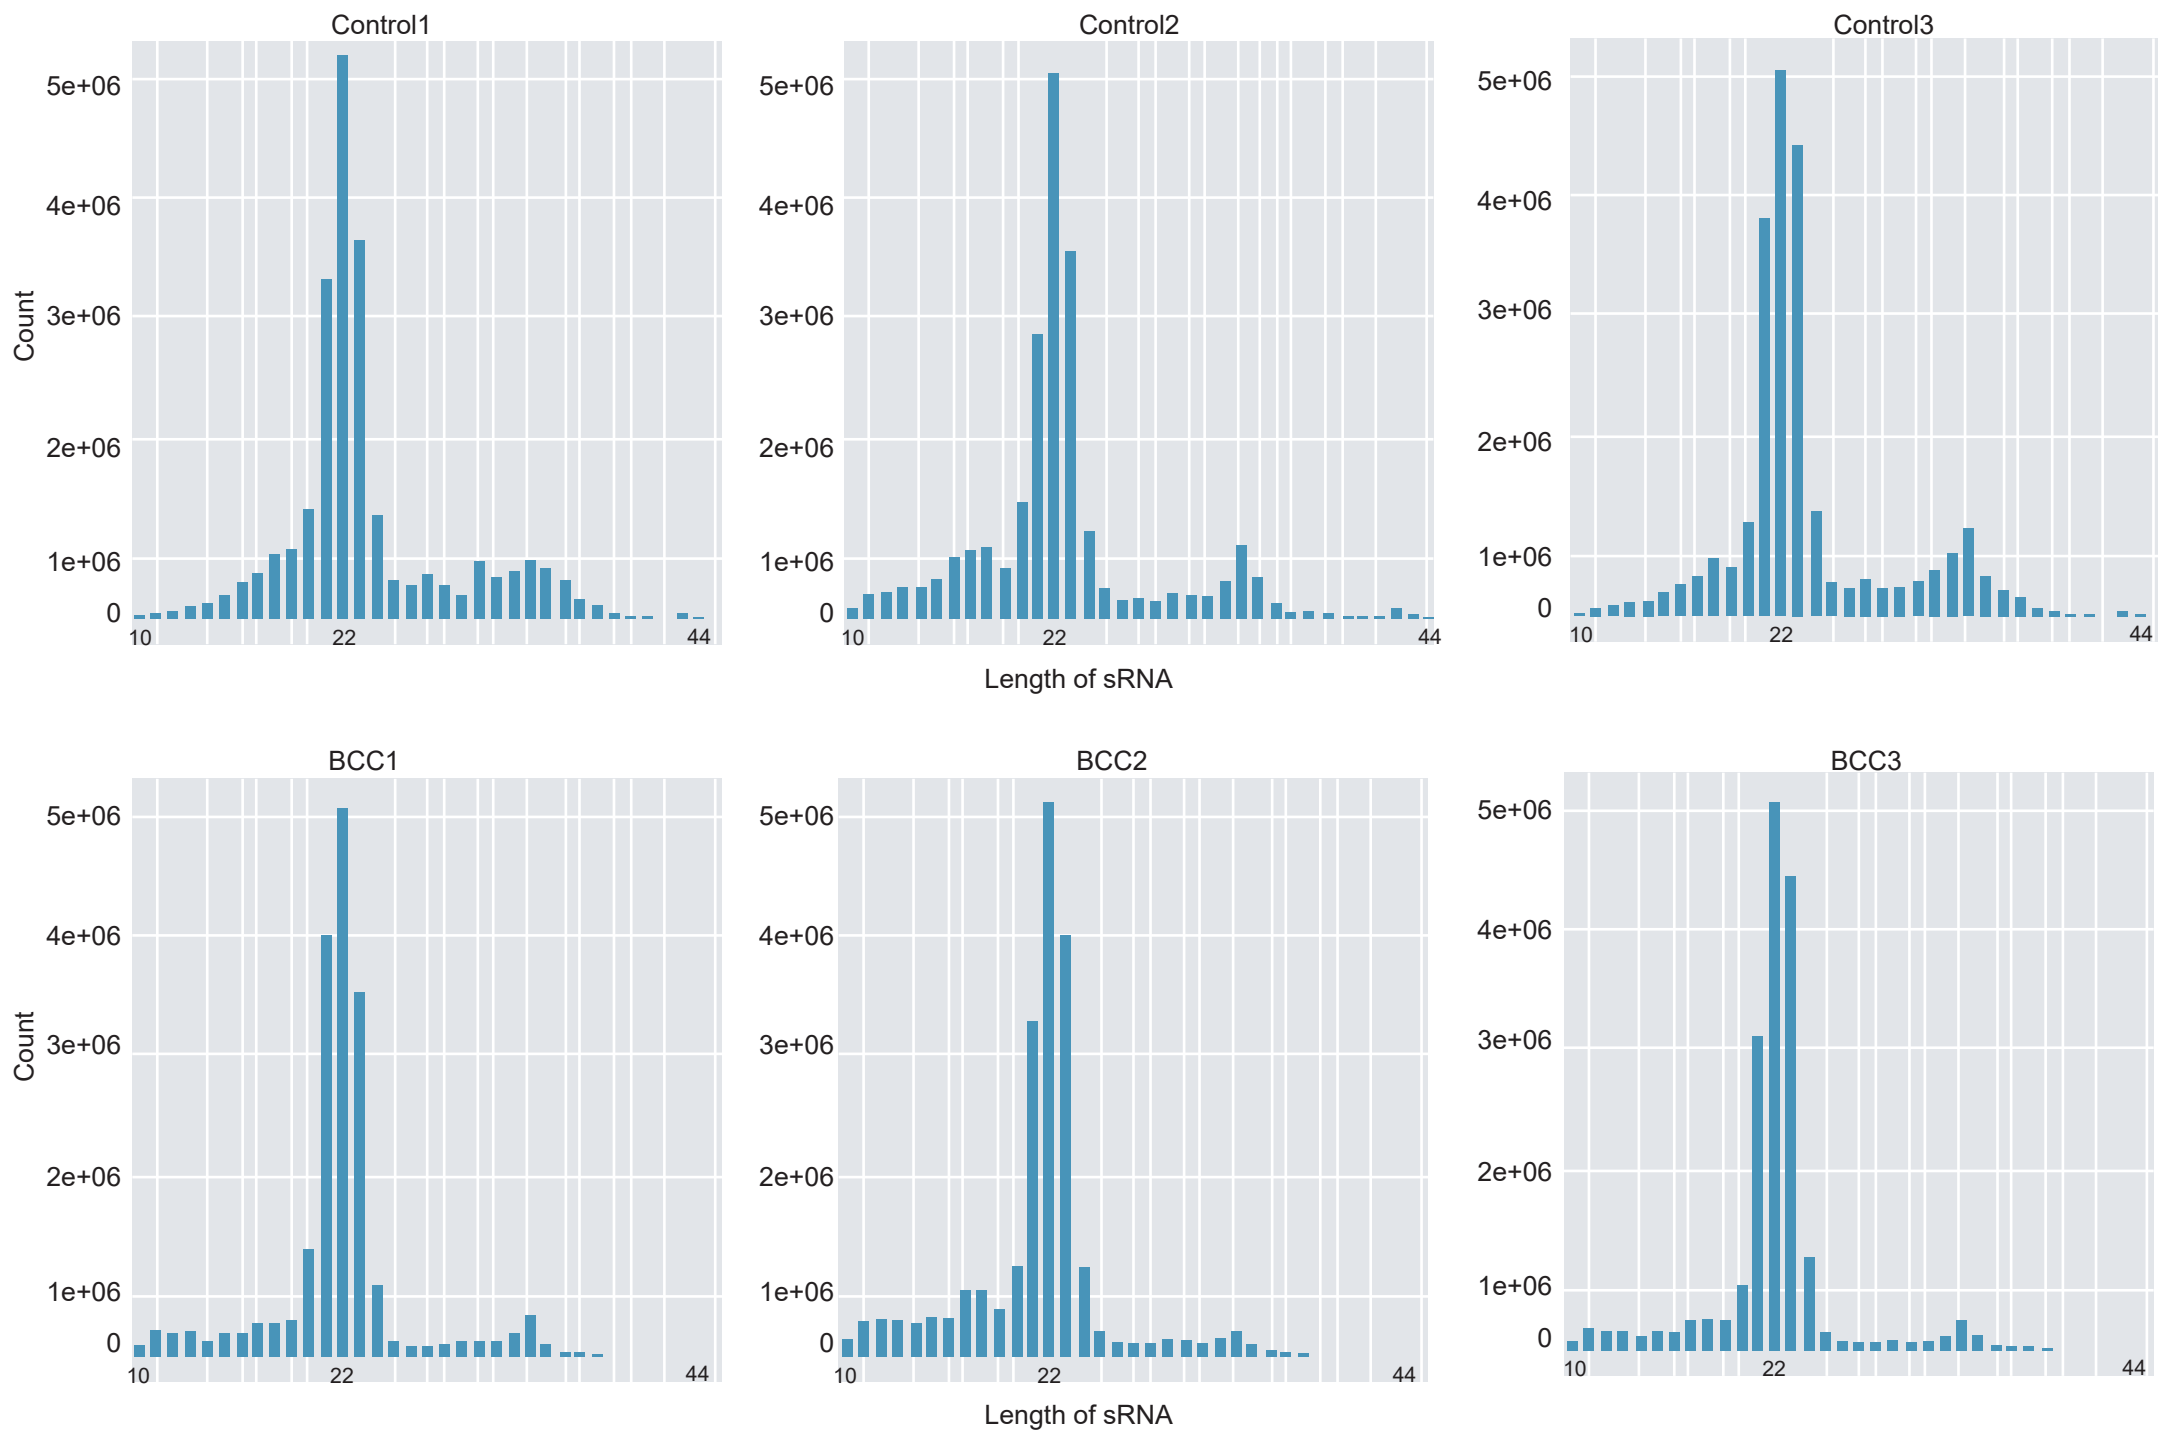

Supplement: f1 [file 7223500.f1.zip]

Supplementary figure 2

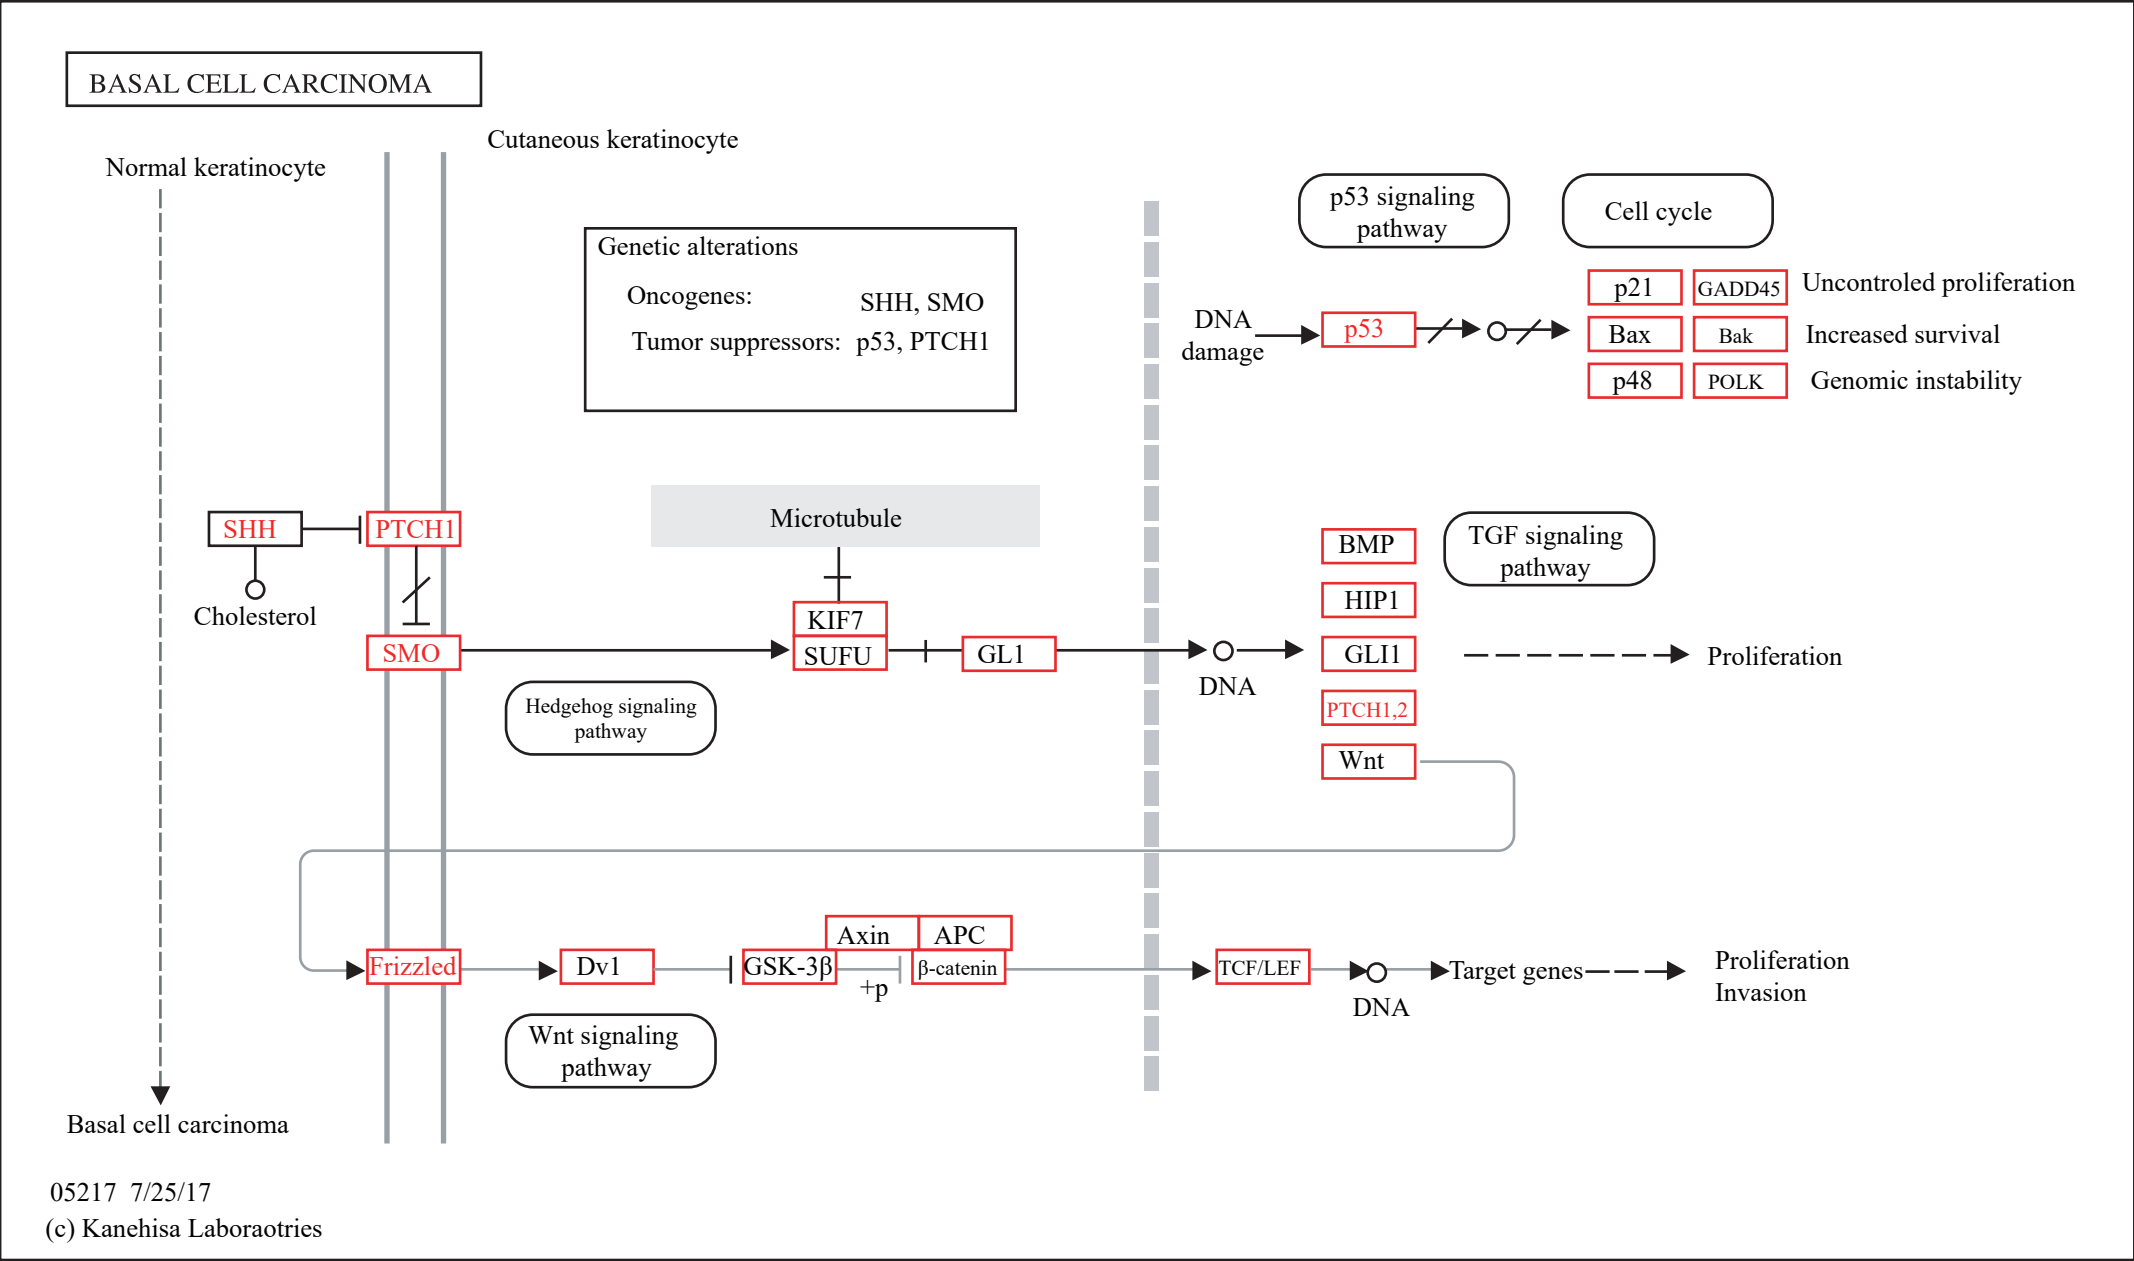

Supplement: f1 [file 7223500.f1.zip]
